# Supplementary material for: High insecticide resistance intensity of Anopheles gambiae (s.l.) and low efficacy of pyrethroid LLINs in Accra, Ghana
Source: Parasit Vectors. 2019 Jun 13;12:299. doi: 10.1186/s13071-019-3556-y (PMC6567633; doi:10.1186/s13071-019-3556-y)
Supplement: Supplementary file 2 — Additional file 2: Table S2. Summary data and graph of overtime susceptibility test of An. gambiae (s.l.) from Opeibea. Table S3. Summary data of intensity assay test of An. gambiae (s.l.) from Opeibea. Table S4. Summary data of the overtime susceptibility test of An. gambiae (s.l.) from Opeibea. [file 13071_2019_3556_MOESM2_ESM.xlsx]

## Sheet: Table S2
						Additional file 2: Table S2. Summary data and graph of overtime susceptibility test of An. gambiae s.l. from Opeibea
2015-12-01							Mortality 24h
Insecticide	Concentration	Knockdown (60 mins)	Mortality (24 hours)	Susceptibility status			Insecticide	2015-03-01	2015-07-01	2015-12-01	2016-05-01	2016-09-01	2017-02-01	2017-05-01	2017-07-01	2017-10-01	average
Deltamethrin	0.05	22.2	19.4	RESISTANT			Deltamethrin 0.05%	19.4444	18	22.2	7	2.6	2.5	0	2.6	8.64198	9.22071
Permethrin	0.75	2.2	0	RESISTANT			Permethrin 0.75%	0	0	2.2	1.3	2.5	0	4.4	2.4	2.63158	1.71462
DDT	4	0	8.2	RESISTANT			DDT 4%	8.16327	0	0	2.5	4.9	6.3	2.1	0	0	2.66259
Dieldrin	4	0	4.3	RESISTANT			Bendiocarb 0.1%	0	4.08163	0	1.4	2.6	3.8	0	0	0	1.32018
Fenitrothion	1	0	5.1	RESISTANT			Propoxur 0.1%	0	0	0	0	5.3	0	6.5	0	1.75439	1.50604
Malathion	5	6.1	69.7	RESISTANT			Malathion 5%	6.06061	26.5306	6.1	2.8	33.3	46.8	15.2	47.4	79.3103	29.278
Bendiocarb	0.1	0	0	RESISTANT			Pirimiphos methyl 0.25%							4.9	18.4	39.4	20.9
Propoxur	0.1	0	0	RESISTANT
2016-05-01
Insecticide	Concentration	Knockdown (60 mins)	Mortality (24 hours)	Susceptibility status
Deltamethrin	0.05	8.1	7	RESISTANT
Permethrin	0.75	0	1.3	RESISTANT
DDT	4	0	2.5	RESISTANT
Bendiocarb	0.1	0	1.4	RESISTANT
Malathion	5	0	2.8	RESISTANT
2016-09-01
Insecticide	Concentration	Knockdown (60 mins)	Mortality (24 hours)	Susceptibility status
Deltamethrin	0.05	2.6	2.6	RESISTANT
PBO+Deltamethrin	5/0.05	70.6	56.5	RESISTANT
Permethrin	0.75	0	2.5	RESISTANT
PBO+Permethrin	5+0.75	27.8	46.8	RESISTANT
DDT	4	0	4.9	RESISTANT
Bendiocarb	0.1	0	2.6	RESISTANT
Propoxur	0.1	0	5.3	RESISTANT
Malathion	5	0	33.3	RESISTANT
Fenitrothion	1	0	5.3	RESISTANT
2017-02-01
Insecticide	Concentration	Knockdown (60 mins)	Mortality (24 hours)	Susceptibility status
Deltamethrin	0.05	0	2.5	RESISTANT
Permethrin	0.75	0	0	RESISTANT
DDT	4	0	6.3	RESISTANT
Malathion	5	5.1	46.8	RESISTANT
Bendiocarb	0.1	0	3.8	RESISTANT
2017-05-01
Insecticide	Concentration	Knockdown (60 mins)	Mortality (24 hours)	Susceptibility status
Deltamethrin	0.05	0	0	RESISTANT
Permethrin	0.75	0	4.4	RESISTANT
DDT	4	0	2.1	RESISTANT
Fenitrothion	1	0	7	RESISTANT
Malathion	5	4.3	15.2	RESISTANT
Bendiocarb	0.1	0	0	RESISTANT
Propoxur	0.1	0	6.5	RESISTANT
Pirimiphos-Methyl	0.25	0	4.9	RESISTANT
2017-06-01
Insecticide	Concentration	Knockdown (60 mins)	Final test mortality (24 hours)	Susceptibility status
Deltamethrin	0.05	12.1951	15.4472	RESISTANT
Permethrin	0.75	0	13.3333	RESISTANT
DDT	4	2.22222	0	RESISTANT
Bendiocarb	0.1	0	1.51515	RESISTANT
Propoxur	0.1	0	5.49645	RESISTANT
Malathion	5	5.26316	48.6842	RESISTANT
Pirimiphos methyl	1	2.27273	40.9091	RESISTANT
2017-07-01
Insecticide	Concentration	Knockdown (60 mins)	Mortality (24 hours)	Susceptibility status
Deltamethrin	0.05	0	2.6	RESISTANT
Permethrin	0.75	2.4	2.4	RESISTANT
DDT	4	0	0	RESISTANT
Fenitrothion	1	0	0	RESISTANT
Malathion	5	0	47.4	RESISTANT
Bendiocarb	0.1	0	0	RESISTANT
Propoxur	0.1	0	0	RESISTANT
Pirimiphos methyl	0.25	0	18.4	RESISTANT

## Sheet: Table S3
Additional file 1: Table S3. Summary data of intensity assay test of An. gambiae s.l. from Opeibea
Insecticides	x	Mortality 24 h
Deltamethrin	1x	2.5641
	5x	23.8636
	10x	35.2941
Permethrin	1x	2.38095
	5x	30.5882
	10x	71.6216
Bendiocarb	1x	0
	5x	0
	10x	4.5977

## Sheet: Table S4
Additional file 2: Table S4. Summary data of the overtime susceptibility test of An. gambiae s.l. from Opeibea
Insecticide	Concentration	Knockdown (60 mins)	Final test mortality (24 hours)	2015-03-01
Deltamethrin	0.05	22.2222	19.4444
Permethrin	0.75	2.22222	0
DDT	4	0	8.16327
Dieldrin	4	0	4.34783
Fenitrothion	1	0	5.12821
Malathion	5	6.06061	69.697
Bendiocarb	0.1	0	0
Propoxur	0.1	0	0
Insecticide	Concentration	Knockdown (60 mins)	Final test mortality (24 hours)	2015-07-01
Deltamethrin	0.05	46.9388	53.0612
Permethrin	0.75	6	18
Bendiocarb	0.1	4.08163	4.08163
Fenitrothion	1	6.12245	26.5306
Insecticide	Concentration	Knockdown (60 mins)	Final test mortality (24 hours)	2017-10-01
Deltamethrin	0.05	8.64198	8.64198
Permethrin	0.75	0	2.63158
DDT	4	0	0
Fenitrothion	1	2.5641	26.9231
Malathion	5	1.72414	79.3103
Bendiocarb	0.1	1.51515	0
Propoxur	0.1	1.75439	1.75439
Pirimiphos-methyl	0.25	0	39.3939
